# Supplementary material for: Interpreting random forest analysis of ecological models to move from prediction to explanation
Source: PubMed Central journal article supplement (PMC9995331; doi:10.1038/s41598-023-30313-8), 2023-03-08
Supplement: 41598_2023_30313_MOESM2_ESM.pdf [file 41598_2023_30313_MOESM2_ESM.pdf]

# 1 Interpreting random forest analysis of ecological models to move from 2 prediction to explanation

3  
4 Sophia M. Simon\*, Paul Glaum\*, Fernanda S. Valdovinos

5  
6 \* Authors Sophia M. Simon and Paul Glaum contributed equally to this work.

7 To whom correspondence may be addressed:

8 Sophia Simon: [sosimon@ucdavis.edu](mailto:sosimon@ucdavis.edu)

9 Paul Glaum: [prglaum@umich.edu](mailto:prglaum@umich.edu)

## 10 11 **Supplementary Information**

12 S1 - Model development

13 S2 - Analyzing Simulation Results w/ Random Forests

14 S3 - Supplementary Analysis Results

### 15 16 **S1 - Model development**

17 In this section we use the online database COMPADRE to investigate model structure, plausible  
18 parameter values, and simulation design. R scripts to run our analysis are presented in SI github. The  
19 analysis presented below was completed in the later part of 2021 and COMPADRE is a growing database.  
20 Therefore, attempts to recreate our analysis at a later date are likely to reflect changes made to the  
21 database.

#### 22 23 *S1.1 - Model structure*

24  
25 Three distinct stages were used as the ontogenetic structure of the plant population in our model:  
26 fecund adults ( $F$ ), non-fecund seedlings ( $S_2$ ), and the seed bank ( $S_1$ ) (Fig 1). While no single ontogenetic  
27 structure can perfectly represent all plant species, three stages is a suitable baseline for the purposes of  
28 this study. First, a three-stage structure creates a tractable dimensionality in our model which allows for  
29 an in depth analysis of interdependent dynamic effects born out of interacting demographic/ecological  
30 rates. Importantly, this allows us to more clearly graphically represent the consequences and details of  
31 interacting rates which would be less apparent in higher dimensional ontogenetic formulations. Second,  
32 using the growing global database of stage-structured plant demographic data, COMPADRE<sup>42</sup>, we can see  
33 that the three stage ontogeny is well-represented in plant taxa empirically. Of all the documented plant  
34 taxa within the COMPADRE database, three-stage plant structures represent roughly 34% of families,  
35 18% of genera, and 14% of species. This includes abundant, species-rich, economically important, and  
36 geographically wide-spread plant families such as *Asteraceae*, *Brassicaceae*, *Orchidaceae*, *Rosaceae*, etc.

37 The plant population in the model experiences density dependent restrictions on the production of  
38 seeds via the maximum function which restricts seed production to a minimum of zero in relation to the  
39 density of  $F$ . Stage transitions are also modified by density dependent pressure with limited density  
40 dependent effects from “younger” via the parameter  $\epsilon$  (see Eq1 & Table 1). Finally, consumer pressure  
41 from the herbivore population ( $H$ ) can differentially focus its herbivory on either the seedling stage ( $a_2 >$   
42  $0$ ,  $a_F = 0$ ), the fecund adult stage ( $a_2 = 0$ ,  $a_F > 0$ ), or both ( $a_2 > 0$ ,  $a_F > 0$ ). Herbivory occurs under a  
43 Type II functional response on each stage, where consumption on each stage is affected by the handling  
44 time required to consume both stages. All stages experience a background mortality rate. Seeds ( $S_1$ )  
45 experience a low level amplification of background mortality linked to adult ( $F$ ) density under the  
46 assumption that sufficiently high populations of conspecific mature plants reduce resources for seeds  
47 (through lack of nutrients, shading, etc.)<sup>43</sup> or increase frequencies of exploitative interactions not

48 explicitly unaccounted for in the model (e.g. soil pathogens)<sup>44,45</sup>. Parameters mediating all density  
 49 dependent effects and trophic interactions are listed and described in Table 1.

$$\begin{aligned}
 50 \quad \frac{dF}{dt} &= \frac{\overbrace{g_{2F}S_2}^{\gamma_{2F} \text{ maturation}}}{1 + \alpha_{g_2}(F + \epsilon S_2)} - \frac{\overbrace{a_F FH}^{\theta_F \text{ consumption}}}{1 + a_F h_F F + a_2 h_2 S_2} - \overbrace{\widehat{d}_F F}^{\text{background mortality}} \\
 51 \quad \frac{dS_2}{dt} &= \frac{\overbrace{g_{12}S_1}^{\gamma_{12} \text{ maturation}}}{1 + \alpha_{g_1}(F + \epsilon(S_1 + S_2))} - \frac{\overbrace{g_{2F}S_2}^{\gamma_{2F} \text{ maturation}}}{1 + \alpha_{g_2}(F + \epsilon S_2)} - \frac{\overbrace{a_2 S_2 H}^{\theta_2 \text{ consumption}}}{1 + a_F h_F F + a_2 h_2 S_2} - \overbrace{\widehat{d}_S S_2}^{\text{background mortality}} \\
 52 \quad \frac{dS_1}{dt} &= \frac{\overbrace{\text{Max}(F(r_F - \alpha_F F), 0)}^{\delta \text{ seed production}}}{1 + \alpha_{g_1}(F + \epsilon(S_1 + S_2))} - \frac{\overbrace{g_{12}S_1}^{\gamma_{12} \text{ maturation}}}{1 + \alpha_{g_1}(F + \epsilon(S_1 + S_2))} - \overbrace{S_1(d_S + \alpha_{FS}F)}^{\text{background mortality}} \\
 53 \quad \frac{dH}{dt} &= c_{FH} \frac{\overbrace{a_F FH}^{\theta_F \text{ consumption}}}{1 + a_F h_F F + a_2 h_2 S_2} + c_{2H} \frac{\overbrace{a_2 S_2 H}^{\theta_2 \text{ consumption}}}{1 + a_F h_F F + a_2 h_2 S_2} - \overbrace{\widehat{d}_H H}^{\text{background mortality}}
 \end{aligned}$$

54

### 55 *S1.2 - Model Parameters*

56

57 The COMPADRE database also allows for further insight into our model. We can use the  
 58 available data to inform certain model parameters. The COMPADRE reproductive and stage transition  
 59 rates mirror our demographic parameters. Production of stage 1 individuals from stage 3 corresponds to  
 60 seed production ( $r_F$ ). Transition from stage 1 to 2 corresponds to seed germination ( $g_{12}$ ) and transition  
 61 from stage 2 to 3 corresponds to seedling maturation ( $g_{2F}$ ). However, these rates represent data from a  
 62 range of different studies using a range of experimental, natural, and agricultural plant demographic data.  
 63 Additionally, these studies involve transition rates which emerge from both competition and trophic  
 64 interactions. Therefore, measurable field rates are frequently emergent from environmental conditions and  
 65 are not necessarily the inherent demographic rates. As such, we do not intend to use these empirical rates  
 66 to determine exact values of our model's demographic parameters. Instead, we use the ranges of each  
 67 empirical rate to inform plausible ranges for their corresponding model parameter to be analyzed in  
 68 parameter sweeps of model simulations.

69 In doing so, we limited our survey of values from each parameter to those greater than 0 as the  
 70 effect of setting any demographic parameter to 0 in the model is obviously a steady fall to extinction (Fig  
 71 S1). Starting with rates of reproduction (Fig S1a), we see a large range of reproduction into the first stage  
 72 from the third, from 0 to roughly 100. However, we limited our preliminary analysis to  $r_F < 10$  as 87%  
 73 of sampled values fall within this range (Fig S1a, Insert). The rates of transition between stages are much  
 74 more evenly distributed from values  $>0$  to 1. While not a completely even distribution across the range,  
 75 we take this as sufficient reason to study the full range of values,  $0.1 < g_{12} < 0.9$  and  $0.1 < g_{2F} < 0.9$ .  
 76 With these results in mind (Fig S1), ranges for these three parameters are provided in Table 1 along with  
 77 both parameter definitions and the ranges/values used for every model parameter.

78

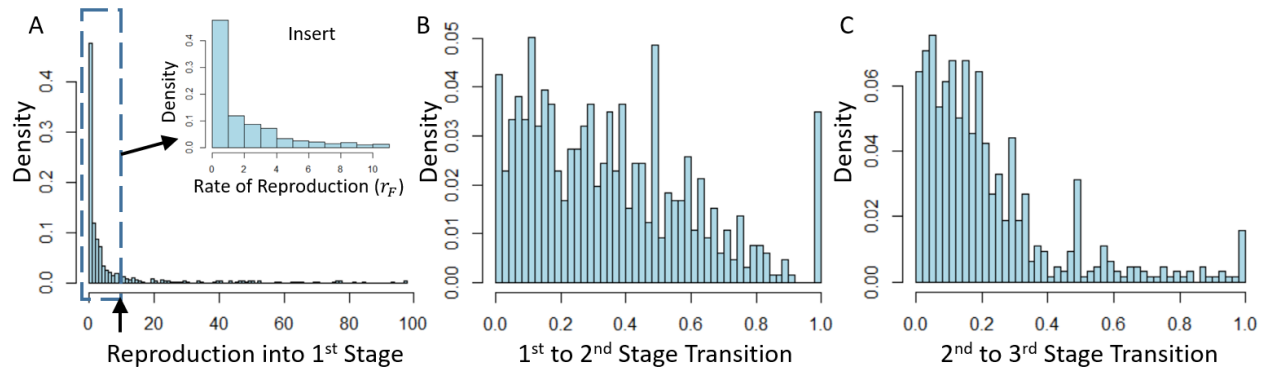

79  
80 **Fig S1:** Distribution of empirically measured reproduction and stage transition rates from three-stage  
81 plant matrix models in the COMPADRE database (2021). a) Reproduction into 1st stage by 3rd stage. b)  
82 Transition rates from stage 1 to 2. Transition rates from stage 2 to 3.  
83

### 84 *S1.3 - Simulation Design & Output*

85  
86 Potentially the most important insight garnered from available data in COMPADRE, we see  
87 absolutely no correlation between any of the measured rates. There is no discernible relationship between  
88 empirical rates of reproduction and maturation from either stage 1 to 2 or 2 to 3 (visualized in Fig S2a &  
89 b). Also, we see no correlation between the stage transition rates (visualized in Fig S2c). The lack of any  
90 relationships in the values of any rate prompted a full factorial investigation of the model's demographic  
91 rates ( $r_F$ ,  $g_{12}$ ,  $g_{2F}$ ; see Table 1 for value range), without any necessary covariation in parameter values.  
92 In other words, all demographic parameter values were factorially tested against each other in a large  
93 parameter sweep without the need to change any one parameter value in concert with another. Past work  
94 also indicates interactivity between demographic rates and trophic interactions in driving model  
95 dynamics<sup>19</sup>, so we considered trophic interactions in our simulation design by including rates of herbivory  
96 ( $a_F$  &  $a_2$ ) into what becomes a five dimensional fully factorial parameter sweep. Herbivore attack rate  
97 ranges were chosen heuristically (Table 1). Herbivore attack rates on either consumed plant stage (see Fig  
98 1d-1i) vary factorially in the parameter sweep as herbivores can range from focusing their attack on either  
99 stage to splitting their consumption between stages to varying degrees.

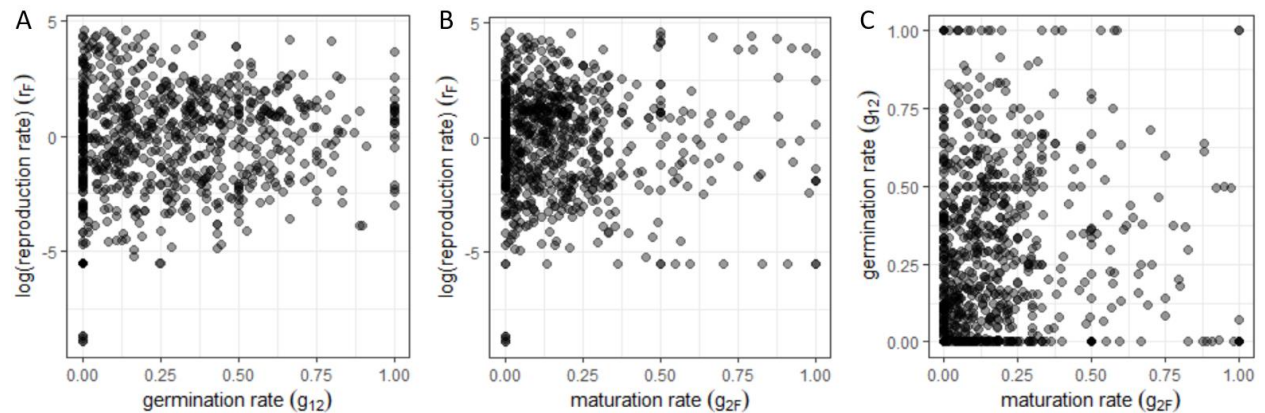

101  
102 **Figure S2:** Scatter plots showing the lack of correlative relationships between COMPADRE (2021)  
103 three-stage reproduction and transition rates. a) Reproduction rates vs transition rates between stages 1 &  
104 2. b) Reproduction rates vs transition rates between stages 2 & 3. c) Reproduction rates between stages 1  
105 & 2 vs transition rates between stages 2 & 3.  
106

107 As a mode of sensitivity testing, we implemented the five parameter factorial sweep across  
108 multiple values for both density dependent parameters and handling times. Density dependent parameters

109 were varied because density dependence mediates stage transitions and therefore ontogenetic dynamics<sup>19</sup>.  
110 Handling time was chosen for its role in mediating the trophic connections interacting with plant  
111 ontogeny. This created eight unique instances of the full five parameter factorial sweeps (see values in  
112 Table 1), producing over 5.5 million unique simulations for analysis.

113 Each simulation outputs a number of initial conditions and post simulation factors detailing the  
114 results of the simulation. Initial conditions include all relevant parameter values and initial time  
115 dependent variable densities (i.e., initial population densities such as  $F(t)$  at time 0). Post simulation  
116 factors include equilibria values, equilibria linear stability, eigenvalues, periodicity, oscillating  
117 populations' peak and trough densities, and finally the effective handling time of the herbivore  
118 population. The effective handling time of the herbivore population is measured as the denominator of the  
119 consumptive interaction in the model.

120

## 121 **S2 - Analyzing Simulation Results w/ Random Forests**

122

123 Due to the large simulation dataset, we first produced an initial guided analysis using the Random  
124 Forest based machine learning algorithm which can achieve high predictive power<sup>46</sup> and has shown  
125 success in using permutation techniques to determine how much specific predictors contribute to that  
126 predictive ability (e.g., mean accuracy decrease<sup>47</sup>). In our case, our five main parameters (see Table 1)  
127 serve as our main random forest features/predictors. Random Forests can predict either categorical or  
128 continuous variables and any post simulation factor can function as the predicted variable in the random  
129 forest analysis. Our interest in trophic/demographic dynamics led us to use the simulation model's linear  
130 stability as our predicted variables. We used a simple indicator, stable or unstable, for categorization  
131 random forest tasks and model equilibria's eigenvalues for regression random forest tasks.

132

### 133 *S2.1 - Preparing data and training Random Forest*

134

135 Simulation data was split into "training" and "validation" (sometimes called test) data subsets for  
136 hold out cross validation. We first created or "trained" the random forest on the training data. In Random  
137 Forests, this process produces a series of unique categorization and regression trees that "vote" on the  
138 outcome (our simulation model's stability) based on the values of any particular inputs (our model  
139 parameters). As a default during training, random forest parameter "mtry" was set at  $\text{floor}(\sqrt{p})$  for  
140 categorization tasks (stable vs unstable) and  $\text{floor}(p/3)$  for regression tasks (max eigenvalue) where  $p=\#$   
141 of features<sup>48</sup>. Instances where a different  $p$  produced better results are noted in the text. The parameter  
142 "ntrees" (No. of trees) was varied from 300-600 with little to no effect on performance.

143

144 Once we have a trained random forest, we check its performance on the training data via the "out  
145 of the box" (OOTB) error rate. Given a sufficiently low error rate, we can begin to investigate feature  
146 importance. We measured the importance of individual features/parameters in our random forest with  
147 Mean Accuracy Decrease, which measures the loss in predictive accuracy by excluding each feature. The  
148 more the accuracy suffers, the more important the variable is for the successful classification/prediction.  
149 For a more detailed description of the mechanisms behind creating and training random forests, please see  
150 ref 14.

150

### 151 *S2.2 - Validating/Testing Trained Random Forest*

152

153 Sufficiently high performing trained random forests were then used to predict simulation output  
154 in our validation data subsets which our random forests had not yet been exposed to. We analyzed the  
155 predictive power of categorization tasks by comparing their predicted output with data via the Area Under  
156 Curve the Receiver Operating Characteristic curve (AUC) metric (pROC package). In our case, the AUC  
157 metric measures how well the models are able to distinguish between stable and unstable results in the  
158 validation data subset. It varies between 0 and 1 with 1 indicating better predictions. Regression tasks  
159 were judged for accuracy using RMSE on maximum eigenvalue measurements between the predicted

160 eigenvalue output and the simulation data. All AUC and RMSE values are from validation data unless  
161 otherwise specified.

162

### 163 *S2.3 - Interpreting Feature Effects*

164

165 Random Forest results can also be further interpreted with the H statistic which functions as a  
166 measure of interactivity between features/predictors in driving prediction results<sup>49</sup>. This can be done for  
167 each individual predictor as a measure of general interactivity with other predictors or be done with a  
168 focus on particular predictors to study direct interactivity between specific predictor combinations.  
169 Regardless, higher numbers indicate higher interaction strengths while lower numbers indicate less  
170 interaction between predictors. While some have argued that the basic random forest measurements of  
171 variable importance (e.g., mean accuracy decrease) “capture” the outcome of interactions between  
172 features in predictions, these metrics are not designed to detect interactions per se<sup>50</sup>. Therefore, our use of  
173 the H statistic helps us hone in on key interactions, a particularly useful outcome for any researcher  
174 looking to implement our methods on a model with a larger parameter set.

175 While the H statistic provides inference regarding which features have strong interactive effects,  
176 other methods are required to determine how features (interacting or otherwise) actually affect the  
177 predicted outcomes. To do this we used two analytical techniques in the *iml* package in R<sup>51</sup>. First, we used  
178 Partial Dependence plots (PD plots) to visualize the marginal effect of one or two features on the  
179 predicted outcome of our random forests<sup>52</sup>. These PD plots can show whether the relationship between the  
180 target and a feature is linear, monotonic or more complex. By focusing on two-feature partial dependence  
181 plots, we can also see how these features interact in changing model predictions (e.g., Fig 2). Second, we  
182 also used Individual Conditional Expectation (ICE) curves to uncover heterogeneous relationships by  
183 showing individual instances of changing a feature’s value at different permutations of the other  
184 features<sup>53</sup>. In using these ICE plots, we found quick evidence of the context dependent relationship of  
185 features and their effect on model predictions (Fig S3), again helping us determine where interactions  
186 matter.

187

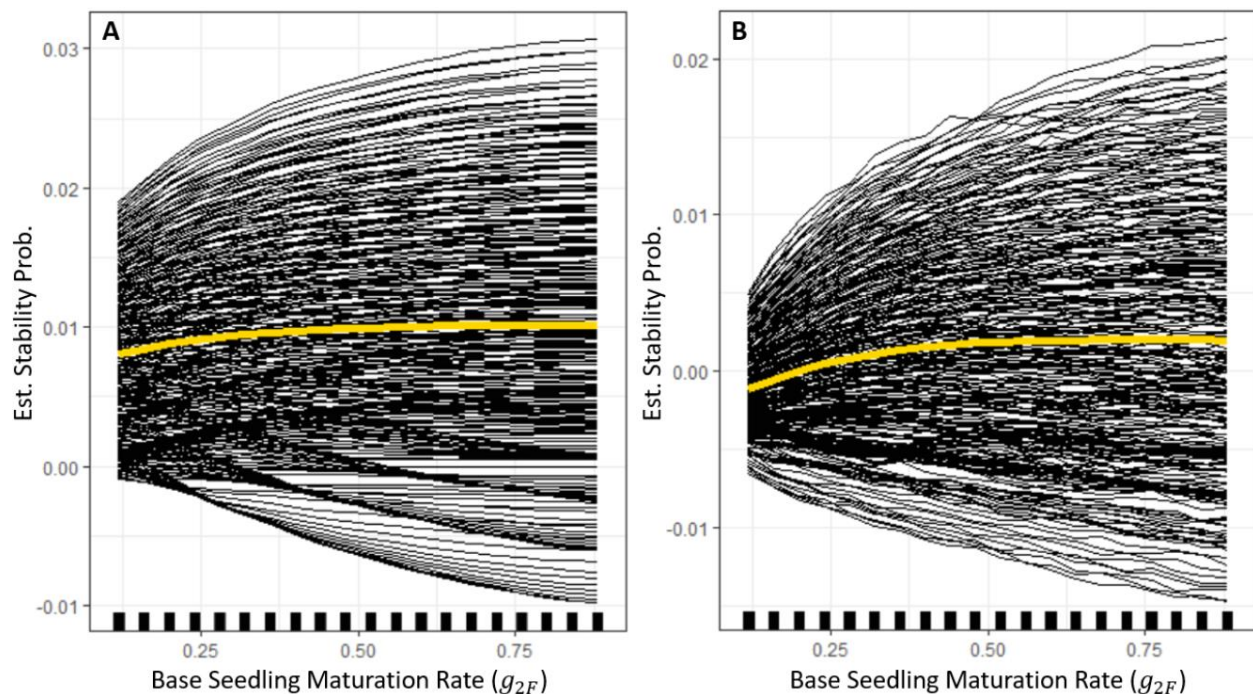

188

189

190

**Figure S3:** a) Example of the high degree of heterogeneity in feature effects on random forest outcome even for set attack rates ( $a_2 = 0.2$  &  $a_F = 1.0$ ) using the  $g_{2F}$  parameter.

191 b) Depiction of the high degree of heterogeneity in feature effects on random forest predictions  
192 using the  $g_{2F}$  parameter as an example.

193 The yellow line represents the average partial dependence effect (PD plot). The black lines show  
194 an Individual Conditional Expectation (ICE) plot; instances of changing  $g_2$  in the context of differing  
195 subsets of other parameters. Both the quantitative and qualitative range of differences seen in the ICE plot  
196 indicate the fidelity lost in only examining the average effects and the need for a more fine scale look at  
197 the heterogeneity in effect per parameter. Note, the right ICE plot only shows results for  $a_2, a_F \leq 1$  in  
198 an effort to reduce the number of plotted lines for the sake of visibility.

### 200 S2.4 – Additional

202 Our random forests can produce a highly accurate level of predictive power. These levels of  
203 predictive ability can induce questions of data leakage in producing and testing our models. We claim this  
204 is not the case here and detail our reasons below. First, the two easiest sources of data leakage are  
205 including the target variable as a feature in creating and training our models while the other is accidental  
206 inclusion of test/validation data in our training data during model training. Neither of these occurred due  
207 to simple due diligence in model creation. Our random forest code can be used to verify these claims.  
208 Second, we have no “give away” features which are effectively tied to our target variables. Third, results  
209 are not driven by particular outliers and are consistent across different subsets used as training and  
210 test/validation datasets. Finally, models’ variable importance changes in explanatory ways across  
211 different subsets of data (e.g., different consumption allocations) and our results are supported by our  
212 graphical analysis (Fig 2) which does not fall victim to data leakage issues. Therefore, we can have high  
213 confidence that our random forest results do not reflect data leakage.

214 Despite the high levels of predictive power (e.g., results shown in Fig. 1), our random forests did  
215 have limits on their immediate interpretability as noted by others (e.g. ref 54). Therefore, we use our  
216 random forest models not as end points on their own, but as tools to direct our analysis across such a large  
217 amount of simulation data. By determining feature importance, effect, and interactivity, we were able to  
218 hone in specific subsections of the simulation model’s parameter space and utilize graphical analysis to  
219 expand our ecological understanding of our results.

## 221 S3 - Supplementary Analysis Results

### 222 S3.1 - Figures

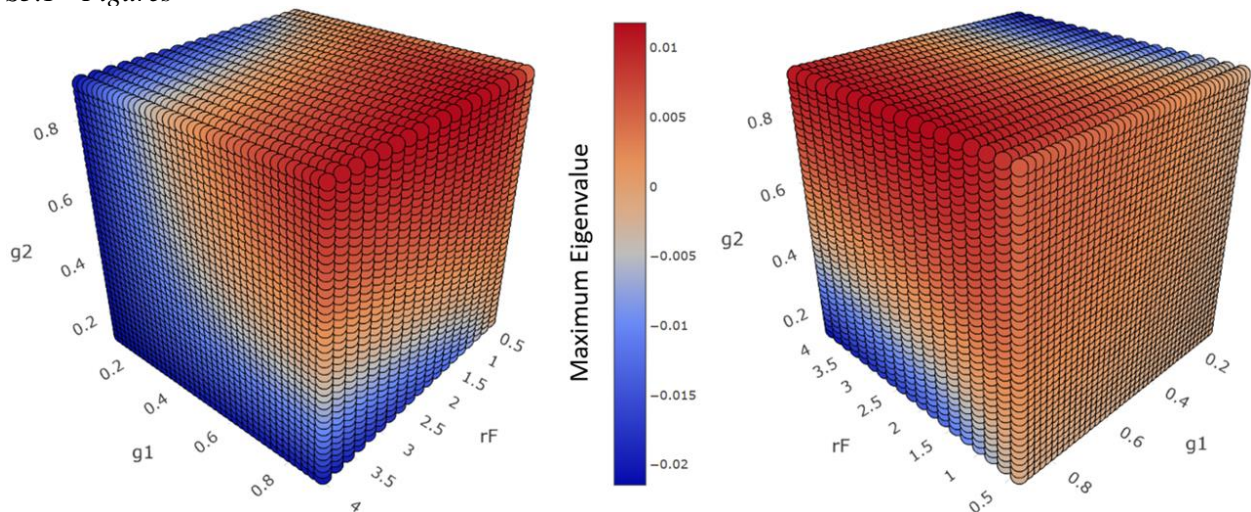

224 **Figure S4:** Maximum eigenvalue of the plant-herbivore system where the herbivore only eats the adult  
225 plant stage ( $a_F > 0, a_2 = 0$ ) across  $\{g_{12}, g_{2F}, r_F\}$  parameter space. Maximum eigenvalue here dictates the  
226

227 dynamic stability of the population trajectories of both species in the interaction. Positive values indicate  
 228 instability and persistent oscillations while negative values indicate damped oscillations to stable  
 229 population trajectories.  
 230

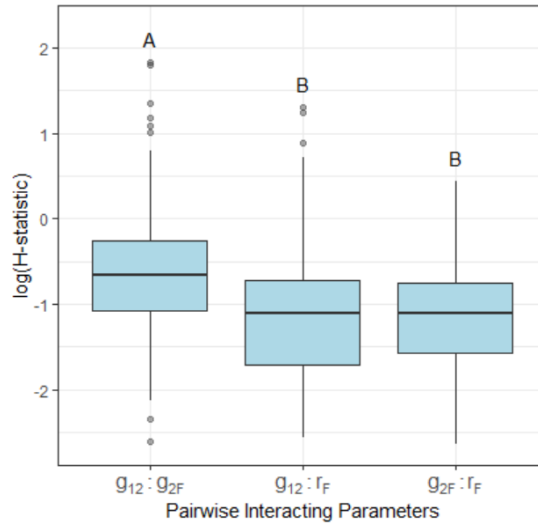

231  
 232 **Figure S5:** Box and whisker plots detailing range of H-statistic (y-axis) for each pair-wise  
 233 interaction of demographic rates (x-axis) in random forests run with set attack rates where  $a_2$  and  
 234  $a_F$  vary between 0.2 and 2.0 ( $\alpha_{g1}=\alpha_{g2}=\alpha_F=0.1$ ;  $h_2=h_F=0.5$ ). The H-statistic measures  
 235 interactivity between our demographic rates and our results here show  $g_{12}$  and  $g_{2F}$  to be the  
 236 most consistently interactive. Letters over boxes indicate significantly different groupings based  
 237 on the Tukey post hoc test. Boxes represent the interquartile range with the horizontal line  
 238 showing the median, the lower box showing the 25 percentile, and the upper box showing the 75  
 239 percentile. Upper and lower lines extending from the boxes show the most extreme values within  
 240 1.5 times the 75th and 25th percentile respectively. Outliers are shown as single dots.  
 241  
 242

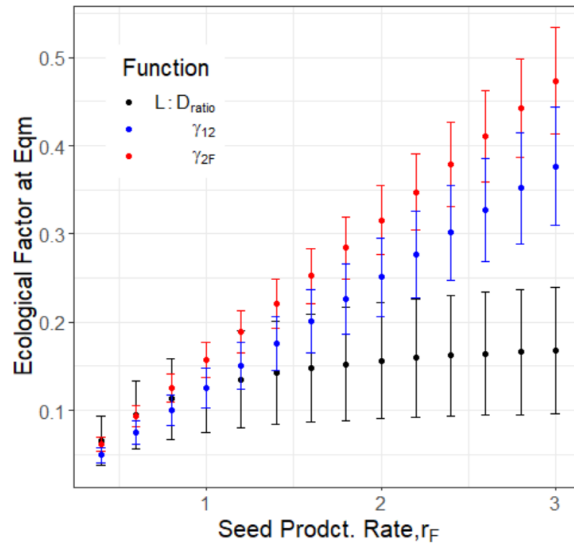

243  
 244 **Figure S6:** Seed production effect on ecological factors with adult-only herbivores. The mean effect of  
 245 raising seed production broken down to average constituent effects on ecological factors across all other  
 246 simulation model parameters. Dots represent mean and error bars show standard deviation.

247  
248

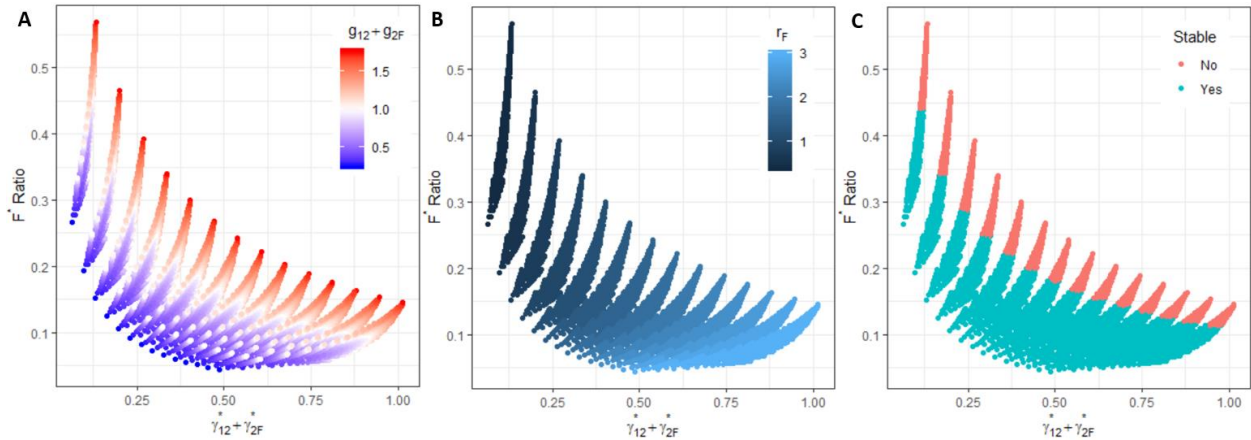

249  
250  
251  
252  
253  
254  
255

**Figure S7:** Changes in  $F^*$  ratio in relation to ecological factors  $\gamma_{12}^*$  and  $\gamma_{2F}^*$ . The y axis,  $F^*$  Ratio is the percent makeup of the adult plant stage defined as  $F^* \text{ Ratio} = \frac{F^*}{S_1^* + S_2^* + F^*}$ . Color contrast shows constituent changes in a) simulation model parameters  $g_{12} + g_{2F}$ , b) simulation model parameter  $r_F$ , c) stability of simulation model.

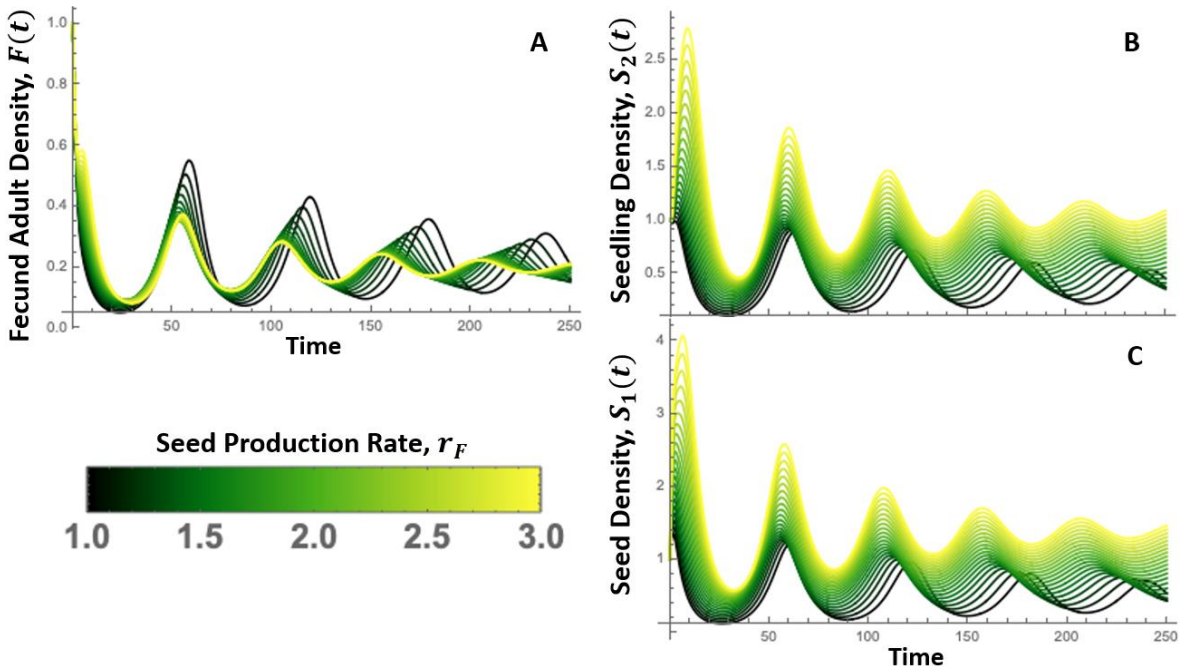

256  
257  
258  
259  
260  
261  
262  
263  
264

**Figure S8:** Time series of Eq1 with an adult-only herbivore. Model dynamics are shown across gradients of values for seed production ( $r_F$ ) with line color corresponding to the value of the parameters shown in the color legend. Figure displays how raising seed production lifts the minimum density in the oscillating plant population, dampening the oscillations and stabilizing the trophic interaction. Panels display time series for a) Fecund adults,  $F$ , b) Seedling,  $S_2$ , and c) Seed bank,  $S_1$ . Other parameters are as follows:  
 $g_{12} = 0.34, g_{2F} = 0.34, a_2 = 0, a_F = 1, r_F = [1,3]$ .



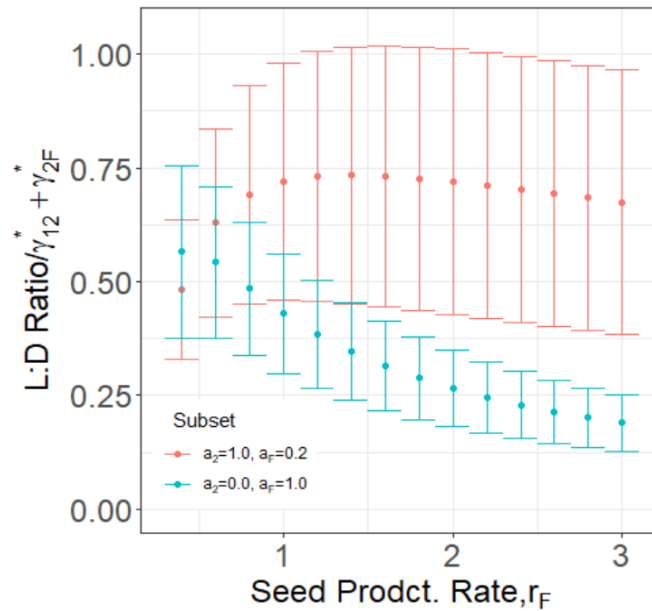

265  
 266 **Figure S9:** The effect of seed production ( $r_F$ ) on our ecological factors. Effects are expressed through the  
 267 relationship,  $\frac{L:D Ratio}{\gamma_{12}^* \& \gamma_{2F}^*}$  to limit clutter of expressing each factor separately. Figure depicts how increasing  
 268 seed production has a greater positive effect on consumption and consequently  $L:D Ratio$  when  $a_2 = 1.0$   
 269 &  $a_F = 0.2$  than when  $a_2 = 0.0$  &  $a_F = 1.0$ .  
 270

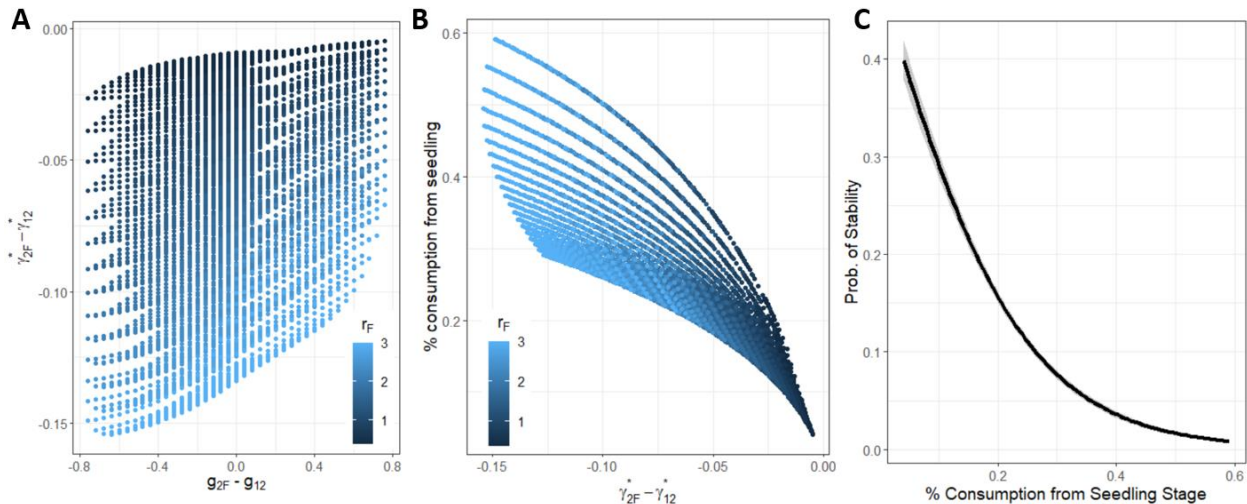

271  
 272 **Figure S10:** Drivers of stabilization in  $a_2 = 0.2$  &  $a_F = 1.0$  herbivory allocation when  $g_{2F}$  is high and  
 273  $g_{12}$  is low. a) As  $g_{12}$  decreases and  $g_{2F}$  increases (measured by  $g_{2F} - g_{12}$ ) this consequentially increases  
 274 seedling maturation while limiting seed germination ( $\gamma_{2F} - \gamma_{12}$ ), reducing the plant density held in the  
 275 seedling stages. b) As the plant density in the seedling stage decreases, so does the percent consumption  
 276 of seedlings, measured here by a decrease in  $\frac{\theta_2}{\theta_F + \theta_2}$ . c) Reducing the percent of seedlings in the diet of the  
 277 herbivore makes the trophic interaction act more like single stage consumption. This increases the  
 278 probability of dampened oscillations to stability as shown via a generalized linear model ( $p < 2e-16$ ,  
 279  $\beta = -8.003$ , Residual deviance: 3815.3 on 5598 degrees of freedom).  
 280  
 281

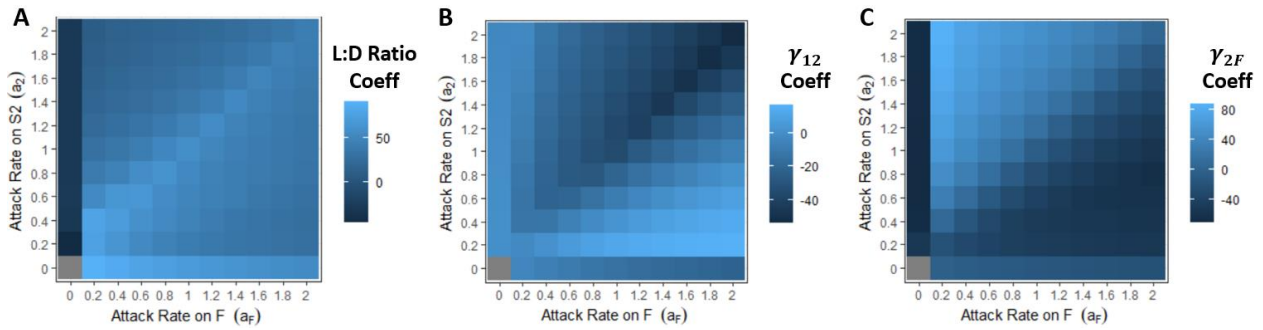

282  
 283 **Figure S11:** Heatmap colors represent ecological effects on stability via coefficients from partial least  
 284 squares regression of ecological factors versus maximum eigenvalue across all specific combinations of  
 285 herbivory on the adult and seedling stages when  $h_2 = 0.5$ ,  $h_F = 1$  and  $\alpha_F, \alpha_{g_1}, \alpha_{g_2} = 0.6$ . The ecological  
 286 factors are a) L:D Ratio, b)  $\gamma_{12}$ , & c)  $\gamma_{2F}$ . Note, the gray square when both attack rates are set to 0  
 287 indicates no data given the lack of consumption. The figure depicts how a lower handling time for  
 288 herbivory on seedlings versus adults can change the dynamic effect of  $\gamma_{12}$  such that increased  
 289 germination can dampen oscillations more consistently across different herbivory allocations.  
 290

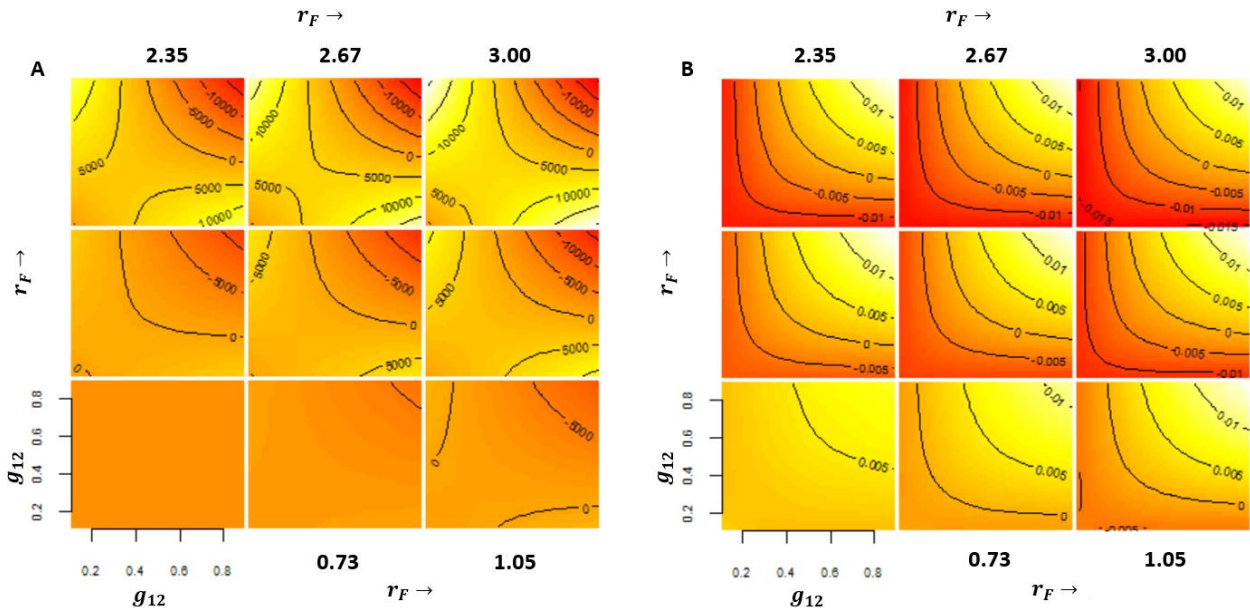

291  
 292 **Figure S12:** Generalized additive model derived representation of simulation results from ( $a_2=0$ ,  $a_F=1$ )  
 293 using a 3-way tensor product smooth on  $g_1$ ,  $g_2$ , and  $r_F$ . a) Results from categorization task (stable as 1  
 294 and unstable as 0). Producing this GAM took substantially more time to calculate than the random forest,  
 295 but it does recreate our results. b) Results from regression task (maximum eigenvalue). “Hotter” colors  
 296 indicate “lower” values. In the categorization task, this indicates higher probabilities of as unstable  
 297 equilibrium (oscillations). In the regression task, conversely this indicates smaller eigenvalues. Overall,  
 298 we can see how the GAMs can recreate the patterns found in our random forest analysis once we have  
 299 developed the necessary parametric hypothesis from our random forest results.  
 300

### 301 S3.2 - Description of $g_{12}$ & $g_{2F}$ vs $\gamma_{12}$ & $\gamma_{2F}$

302  
 303 Although the  $g_{12}$  &  $g_{2F}$  parameters and  $\gamma_{12}$  &  $\gamma_{2F}$  ecological sub-functions we labeled “factors”  
 304 (Table 1) are related, their relationship is not 1:1. Specifically,  $g_{12}$  and  $g_{2F}$  are parameters in the model  
 305 representing the per-capita germination/maturation rates of seeds/seedlings. The fixed values of these

306 parameters are assigned for each simulation and are not dynamic. These parameters represent the rate of  
307 maturation without density dependent effects.

308 The  $\gamma_{12}$  and  $\gamma_{2F}$  sub-functions/components in the model represent the density of seeds/seedlings  
309 that germinate/mature to the seedling/adult stages over a timestep. The values of these sub-functions are  
310 an emergent property of the model resulting from the interaction between herbivore consumption and  
311 internal plant demography. For example, the parameter  $r_F$  affects the output of  $\gamma_{12}$  and  $\gamma_{2F}$ . Unlike  $g_{12}$   
312 and  $g_{2F}$ , (which are fixed parameters),  $\gamma_{12}$  and  $\gamma_{2F}$  may increase with  $r_F$  as increased seed production  
313 boosts the flow of plant density through all stages. By increasing the number of plant individuals  
314 maturing, we observe a greater number of plant individuals replacing those lost to consumption. In our  
315 analysis,  $\gamma_{12}$  and  $\gamma_{2F}$  (along with L:D ratio) are treated as explanatory variables which we label  
316 “ecological factors,” to differentiate them from other statistical inputs used in our other analyses.

317

## 318 **Numbered References**

319

320 42. COMPADRE Plant Matrix Database. Available from: <[www.compadre-db.org](http://www.compadre-db.org)>, accessed 10 August  
321 2021, ver. 6.20.9.0. (2021).

322

323 43. Tilman, D. et al. Productivity and sustainability influenced by biodiversity in grassland ecosystems. –  
324 *Nature* **379**, 718–720 (1996).

325

326 44. Janzen, D. H. Herbivores and the number of tree species in tropical forests. – *Am. Nat.* **104**, 501–528  
327 (1970).

328

329 45. Connell, J. H. On the role of natural enemies in preventing competitive exclusion in some marine  
330 animals and in rain forest trees. – In: Boer, P. J. and Gradwell, G. R. (eds), *Dynamics of populations:*  
331 *proceedings of the advanced study institute on ‘dynamics of numbers in populations’*. Pudoc Oosterbeek,  
332 the Netherlands, 298–312 (1971).

333

334 46. Breiman, L. Statistical Modeling: The Two Cultures (with comments and a rejoinder by the author).  
335 *Statistical Science* **16**, 199–231. <https://doi.org/10.1214/ss/1009213726> (2001b).

336

337 47. Fisher, A., Rudin, C., & Dominici, F. All models are wrong but many are useful: Variable importance  
338 for black-box, proprietary, or misspecified prediction models, using model class reliance. ArXiv e-prints.  
339 (2018).

340

341 48. Liaw, A. & Wiener, M. Classification and Regression by randomForest. R News 2(3), 18--22.  
342 <https://cran.r-project.org/web/packages/randomForest/randomForest.pdf> (2002).

343

344 49. Friedman, J. H., & Popescu, B. E. Predictive learning via rule ensembles. *The Annals of Applied*  
345 *Statistics* **2**, 916–954. <https://doi.org/10.1214/07-AOAS148> (2008).

346

347 50. Wright, M.N., Ziegler, A., König, I.R. Do little interactions get lost in dark random forests? *BMC*  
348 *Bioinformatics* **17**, 145: DOI 10.1186/s12859-016-0995-8 (2016).

349

350 51. Molnar, Christoph, Giuseppe Casalicchio, and Bernd Bischl. "iml: An R package for interpretable  
351 machine learning." *Journal of Open Source Software* **3.26**, 786 (2018).

352

353 52. Friedman, Jerome H. “Greedy function approximation: A gradient boosting machine.” *Annals of*  
354 *statistics* 1189-1232 (2001).

355

- 356 53. Goldstein, A., Kapelner, A., Bleich, J., Pitkin, E. Peeking inside the black box: Visualizing statistical  
357 learning with plots of individual conditional expectation. *Journal of Computational and Graphical*  
358 *Statistics* **24(1)**, 44-65 (2015).  
359
- 360 54. Ribeiro, M. T., Singh, S., & Guestrin, C. “Why Should I Trust You?”: Explaining the predictions of  
361 any classifier. *In Proceedings of the 22nd ACM SIGKDD International Conference on Knowledge*  
362 *Discovery and Data Mining, KDD '16*. ACM, New York, NY, USA, 1135–1144 (2016).
